# Supplementary figures and images for: Death without progression as an endpoint to describe cardiac radiation effects in locally advanced non-small cell lung cancer
Source: PubMed Central journal article supplement — Clin Transl Radiat Oncol. 2023 Jan 13;39:100581. doi: 10.1016/j.ctro.2023.100581 (PMC9860414; doi:10.1016/j.ctro.2023.100581), 2023-01-13

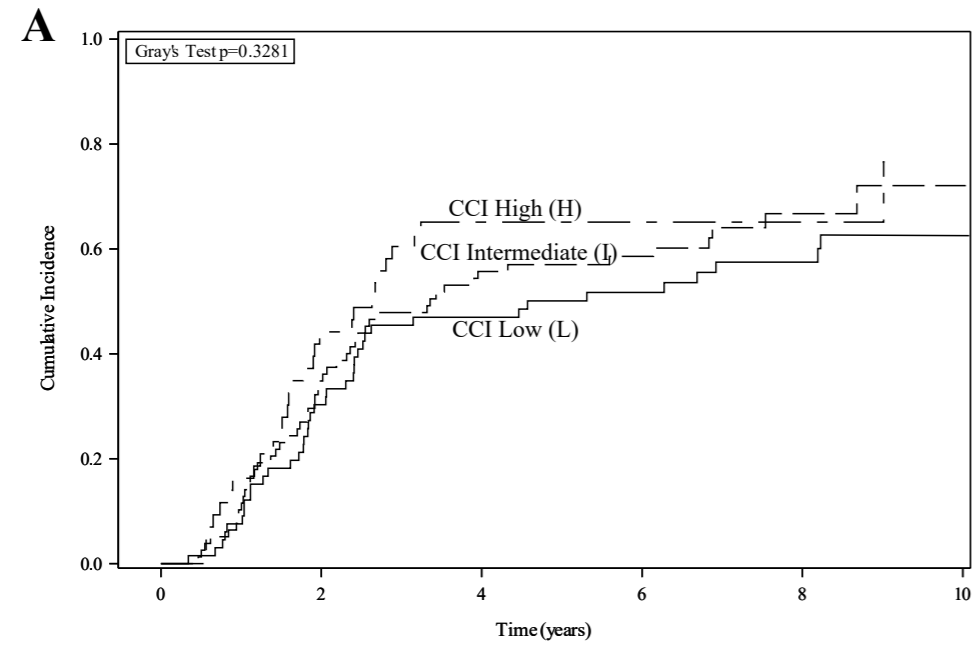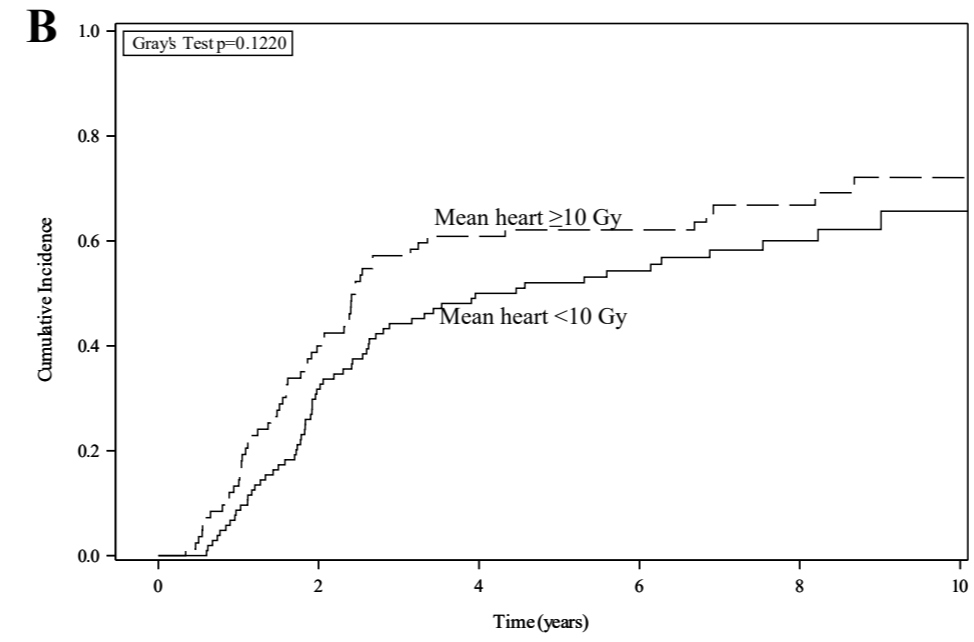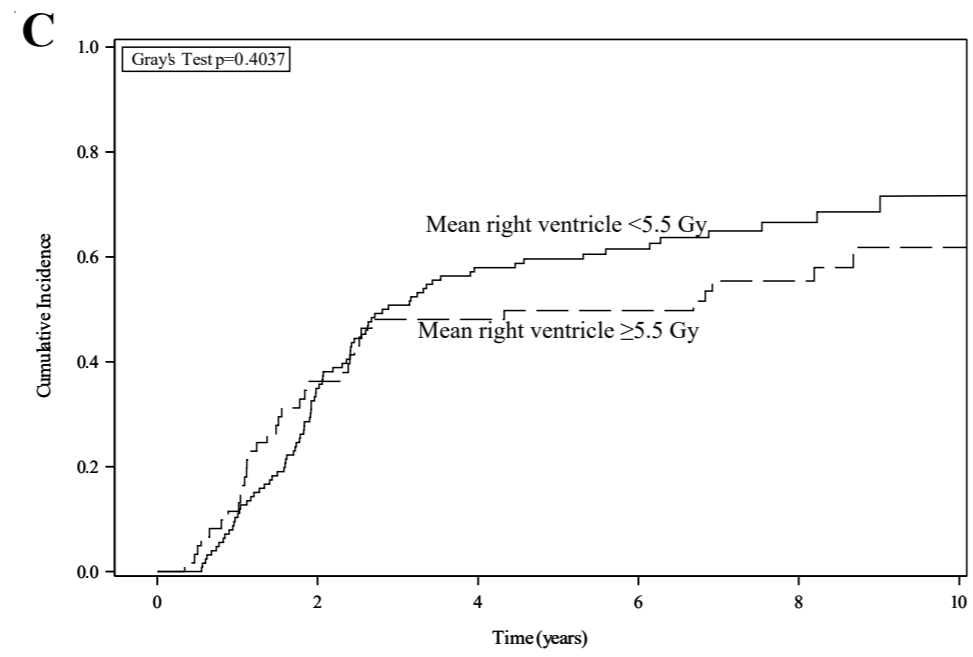

Supplement: mmc1.pdf [file mmc1.pdf]
